# Supplementary material for: 3D porous flower-like CoAl2O4 to boost the photocatalytic CO2 reduction reaction
Source: Royal Society of Chemistry journal article supplement (doi:10.1039/d2ta08947e), 2023-01-01
Supplement: d2ta08947e1.pdf [file d2ta08947e1.pdf]

## Supporting Information for

### 3D porous flower-like CoAl<sub>2</sub>O<sub>4</sub> to boost photocatalytic CO<sub>2</sub> reduction reaction

Fei Lv,<sup>a</sup> Wenyuan Zhang,<sup>b</sup> Lang He,<sup>a\*</sup> Xue Bai,<sup>a</sup> Yi Song,<sup>a\*</sup> Yan Zhao<sup>a\*</sup>

<sup>a</sup> The Institute of Technological Sciences, Wuhan University, Wuhan, 430072, P. R. China.

<sup>b</sup> School of Chemistry and Chemical Engineering, Harbin Institute of Technology, Harbin, 150080, P. R. China

\* Corresponding author

E-mail: [langhe@whu.edu.cn](mailto:langhe@whu.edu.cn) (L. He)

[yi.song@whu.edu.cn](mailto:yi.song@whu.edu.cn) (Y. Song)

[yan2000@whut.edu.cn](mailto:yan2000@whut.edu.cn) (Y. Zhao)

|                 |                                                                                                |
|-----------------|------------------------------------------------------------------------------------------------|
| <b>S1</b>       | Materials and chemicals                                                                        |
| <b>S2</b>       | Synthesis of 3D flower-like CoAl-LDHs                                                          |
| <b>S3</b>       | Materials characterizations                                                                    |
| <b>S4</b>       | CO <sub>2</sub> -TPD measurement t                                                             |
| <b>S5</b>       | Photoelectrochemistry measurement                                                              |
| <b>S6</b>       | Photocatalytic CO <sub>2</sub> reduction                                                       |
| <b>Table S1</b> | Temperature change of photocatalytic CO <sub>2</sub> reduction under visible light irradiation |
| <b>Fig.S1</b>   | The SEM images of CoAl-LDH.                                                                    |
| <b>Fig.S2</b>   | (a) SEM image of CoAl-650; (b)EDS of CoAl-650; (c-e) elemental mapping of (a).                 |
| <b>Fig.S3</b>   | (a) SEM image of CoAl-850; (b)EDS of CoAl-850; (c-e) elemental mapping of (a).                 |
| <b>Fig.S4</b>   | The N <sub>2</sub> adsorption-desorption isotherms and pore size distribution                  |

|               |                                                                                                                                                                    |
|---------------|--------------------------------------------------------------------------------------------------------------------------------------------------------------------|
|               | (inset) of (a) CoAl-LDH; (b) CoAl-650; (c) CoAl-750; (d) CoAl-850.                                                                                                 |
| <b>Fig.S5</b> | (a) TEM image of CoAl-750.                                                                                                                                         |
| <b>Fig.S6</b> | Valence band XPS spectra of the CoAl-750.                                                                                                                          |
| <b>Fig.S7</b> | Comparison of gas chromatograms of photocatalyzed CO <sub>2</sub> reduction gas products over CoAl-750 catalyst after reaction under different conditions for 1 h. |
| <b>Fig.S8</b> | SEM image of the CoAl-750 catalyst after five photocatalytic CO <sub>2</sub> reduction cycles (35h).                                                               |
| <b>Fig.S9</b> | Model for (a) CoAl <sub>2</sub> O <sub>4</sub> (111) and (b) CoAl <sub>2</sub> O <sub>4</sub> (111) adsorbs CO <sub>2</sub> molecules.                             |

## S1 Materials and chemicals

All of the chemical reagents were analytical grade and used without further purification. Cobalt nitrate hexahydrate ( $\text{Co}(\text{NO}_3)_2 \cdot 6\text{H}_2\text{O}$ ), Aluminum nitrate nonahydrate ( $\text{Al}(\text{NO}_3)_3 \cdot 9\text{H}_2\text{O}$ ), urea ( $\text{CH}_4\text{N}_2\text{O}$ ) and ammonium fluoride ( $\text{NH}_4\text{F}$ ) were purchased from Aladdin Reagent Co., Ltd. and carbon dioxide gas ( $\text{CO}_2$  99.99 %), carbon monoxide gas ( $\text{CO}$  99.90 %), methane gas ( $\text{CH}_4$  99.999 %) were purchased from Wuhan Wu Gang Gas Co. Ltd. Deionized (DI) water was used in all experiments.

## S2 Synthesis of 3D flower-like CoAl-LDHs

A urea hydrolysis reaction was used to synthesize CoAl-LDHs without surfactant. 0.8 mmol  $\text{Co}(\text{NO}_3)_2 \cdot 6\text{H}_2\text{O}$ , 0.4 mmol  $\text{Al}(\text{NO}_3)_3 \cdot 9\text{H}_2\text{O}$ , 4 mmol  $\text{NH}_4\text{F}$  and 28 mmol urea were mixed in 40 mL DI water and the mixed solution was continuously stirred for 1 h.

The solution was transferred into a 100 mL Teflon-lined stainless steel autoclave. The autoclave was sealed and heated at 90°C for 8 h in an electric blower drying box. After cooling to room temperature, the obtained pink CoAl-LDHs were thoroughly cleaned with DI water and ethanol. The prepared powder was dried in air at 60°C for 12 h and named as CoAl-LDHs.

### **S3 Materials characterizations**

In order to identify the crystal phase of the samples, the powder X-ray diffraction (XRD) patterns of the sample were obtained using Cu K $\alpha$  radiation source ( $\lambda=1.54056$  Å) at a scan rate of 5° min<sup>-1</sup> on a D/MAX-2500 diffractometer (Riga, Japan). Scanning electron microscope (SEM) images were obtained on the MIRA3 field emission SEM. Transmission electron microscope (TEM) images, high-resolution transmission electron microscope (HRTEM) images and selected electron diffraction (STEM) patterns were converged on the JEM-2100 TEM. X-ray photoelectron spectroscopy (XPS) data was obtained by ESCALAB 250Xi. The solid-state UV diffuse reflectance absorption spectrum in the region of 200 ~800 nm was recorded on a Shimadzu 2450 spectrophotometer using BaSO<sub>4</sub> as the reflectance standard. Brunauer- Emmett-Teller (BET) surface areas were measured using a JW-BK100B with N<sub>2</sub> adsorption-desorption after drying under vacuum at 150 °C for 5 h. Fourier transform infrared spectra (FT-IR) were recorded on a PerkinElmer Spectrum FT-IR spectrometer. The AutoChem TP5080 chemisorption analyzer performs temperature program desorption (TPD) investigations of CO<sub>2</sub>, using mass spectra (QIC-20, Hidden) to record CO<sub>2</sub> signals. Thermogravimetry combined with Fourier transform infrared spectroscopy (TG-FTIR)

and thermogravimetry coupled with mass spectrometry (TG–MS) were used to analyze the thermal degradation products from the synthesis of  $\text{CoAl}_2\text{O}_4$ .

#### **S4 CO<sub>2</sub>-TPD measurement**

The measurement method of CO<sub>2</sub>-TPD is as follows. (1) Take 50 mg catalyst and put it into TP-5080-D instrument special quartz tube. (2) Purge the system with He at room temperature at a flow rate of 30 mL/min for 10 minutes to remove contaminants on the surface of the catalyst, and then TPD is characterized. (3) Purge system with CO<sub>2</sub> at room temperature for 30 minutes at a flow rate of 30 mL/min. (4) Stop CO<sub>2</sub> feeding when the CO<sub>2</sub> baseline is stable. Clean the system with He for 10 minutes at a flow rate of 30 mL/min to remove any gaseous CO<sub>2</sub> residue. (5) The temperature is heated to 800°C and the heating rate is 10°C/min. Mass spectrometry (QIC-20, Hidden) is used to measure CO<sub>2</sub> desorption.

#### **S5 Photoelectrochemistry measurement**

The electrochemical measurements are carried out on an electrochemical workstation (CHI760C, Chinstruments, China) utilizing a three-electrode setup. The counter electrode is a Pt foil, the reference electrode is an Ag/AgCl electrode, and the working electrode is an FTO conductive glass (11cm) with the conducting side covered with thin sample film. The electrolyte is 0.5 M Na<sub>2</sub>SO<sub>4</sub> solution.

#### **S6 Photocatalytic CO<sub>2</sub> reduction**

The photocatalytic CO<sub>2</sub> reduction experiment was conducted in a 200 mL customized Pyrex reactor; the two openings of the reactor were sealed with silicone rubber. A 300W Xenon lamp is placed 10 cm above the reactor, serving as the light

source that induced the photocatalytic process. In a typical photocatalysis experiment, 5 mL of DI water was added and swirled by ultrasonic for three minutes to make a suspension out of 50 mg of prepared  $\text{CoAl}_2\text{O}_4$  photocatalyst in a glass petri dish with a diameter of 6 cm. The petri dish was dried in the oven at 60 °C. In order to provide a hydrogen source for photocatalytic reduction of  $\text{CO}_2$ , 500  $\mu\text{L}$  of DI water was uniformly covered on the surface of the dried photocatalyst. After purging the system with  $\text{CO}_2$  at a rate of 30 mL/min for 20 min, turned on the xenon lamp, and the system was kept at 0.8 KPa pressure (all-glass automatic online trace gas analysis system, Labsolar 6A, Beijing Perfectlight Technology Co., Ltd., China). Gas chromatography and flame ionization detection (GC-9790II) were employed to measure products every 30 minutes. The catalytic temperature was maintained at about 25 °C under light irradiation with cooling water, and the temperature was measured every hour with an IR608A thermometer (**Table S1**).

**Table S1** Temperature change of photocatalytic  $\text{CO}_2$  reduction under visible light irradiation

| <b>Test times (h)</b>   | <b>0</b> | <b>1</b> | <b>2</b> | <b>3</b> | <b>4</b> | <b>5</b> | <b>6</b> | <b>7</b> |
|-------------------------|----------|----------|----------|----------|----------|----------|----------|----------|
| <b>Temperature (°C)</b> | 25.2     | 25.1     | 25.0     | 25.2     | 25.0     | 25.1     | 25.0     | 25.3     |

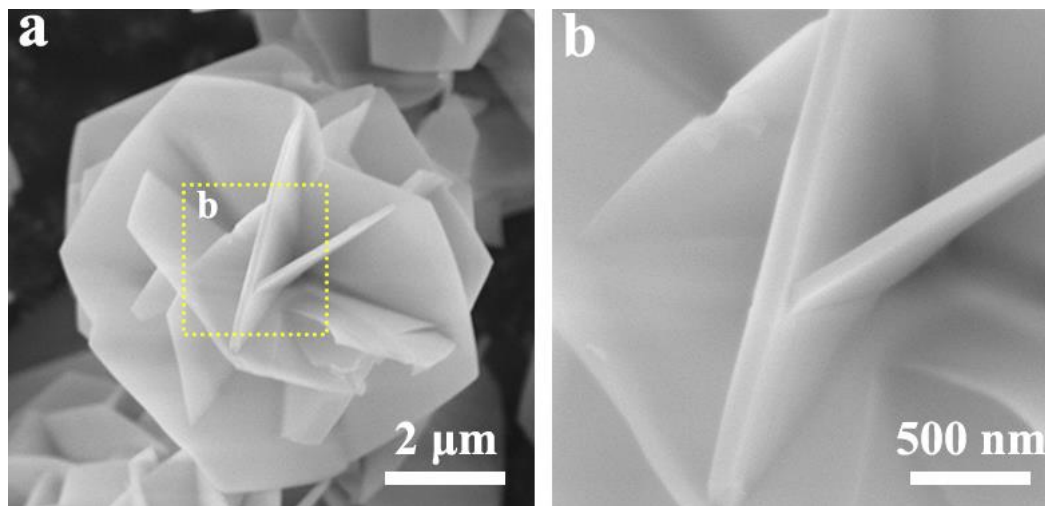

**Fig.S1.** The SEM images of CoAl-LDH.

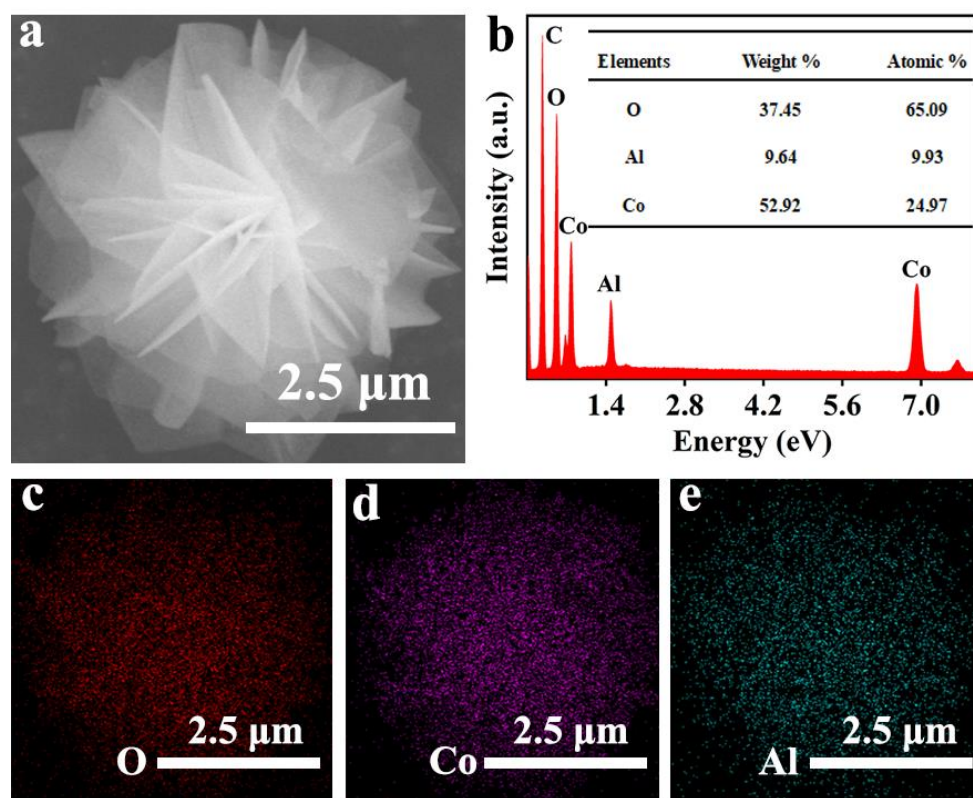

**Fig.S2.** (a) SEM image of CoAl-650; (b)EDS of CoAl-650; (c-e) elemental mapping of (a).

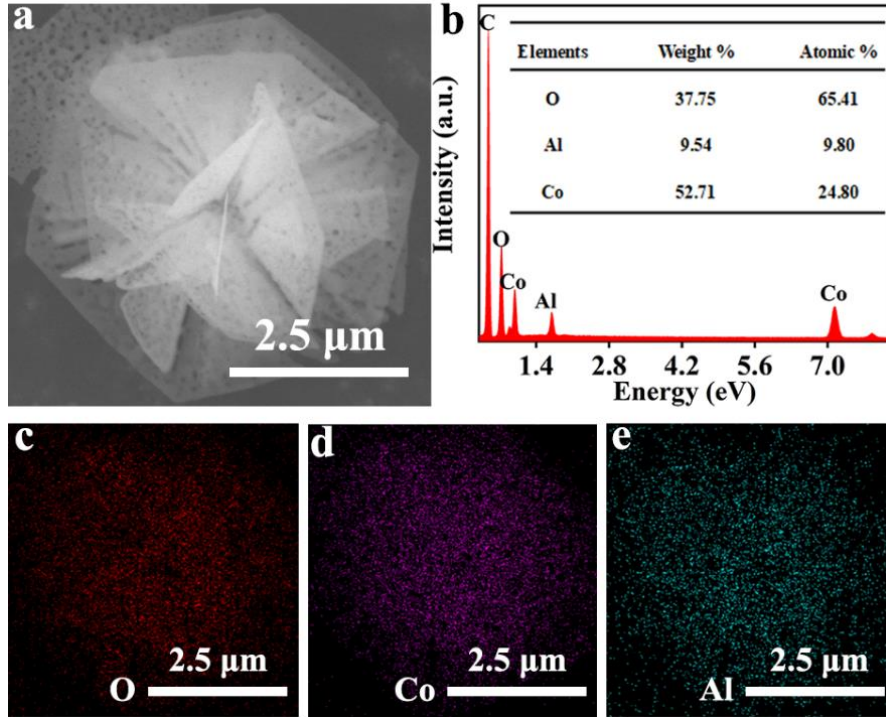

**Fig.S3.** (a) SEM image of CoAl-850; (b)EDS of CoAl-850; (c-e) elemental mapping of (a).

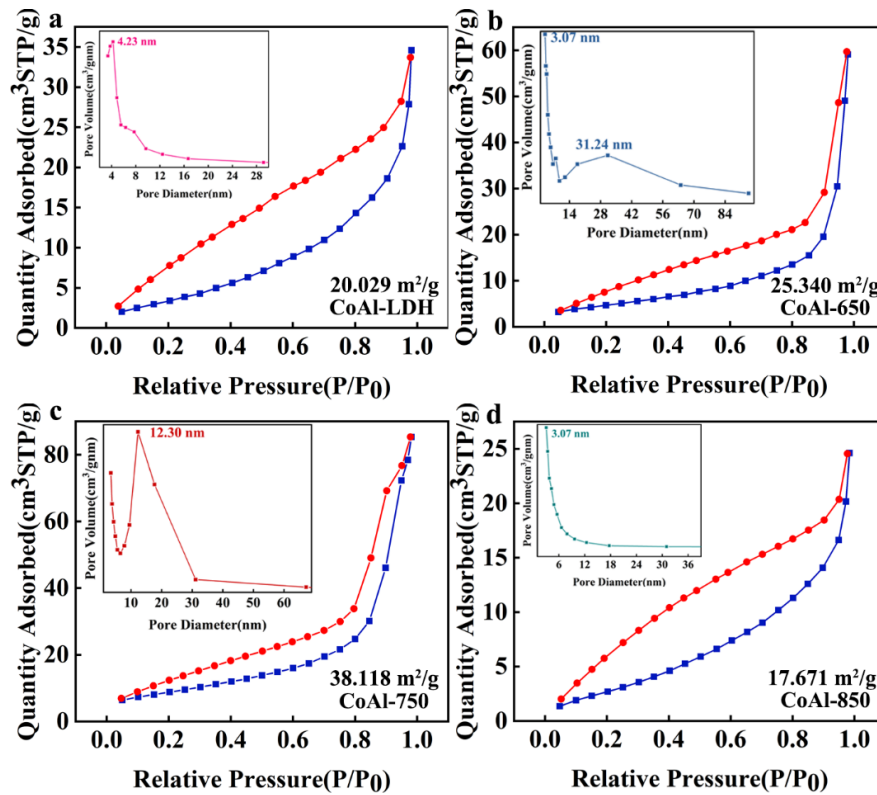

**Fig.S4.** The N<sub>2</sub> adsorption-desorption isotherms and pore size distribution (inset) of (a) CoAl-LDH; (b) CoAl-650; (c) CoAl-750; (d) CoAl-850.

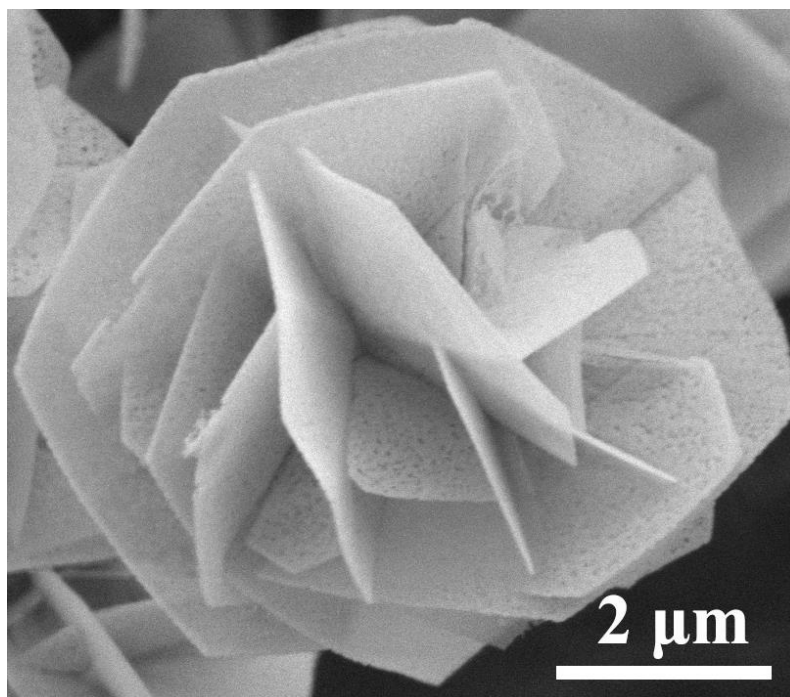

Fig.S5. (a) TEM image of CoAl-750.

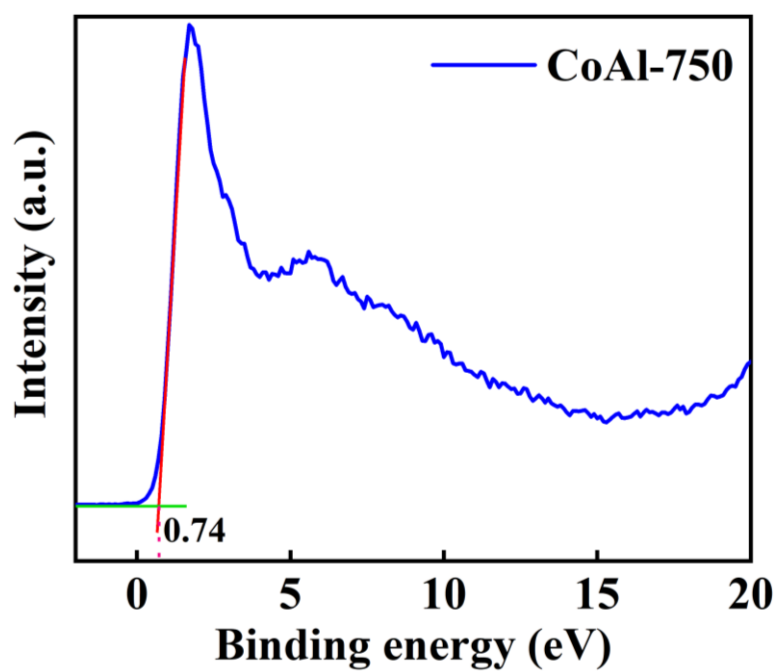

Fig.S6. Valence band XPS spectra of the CoAl-750.



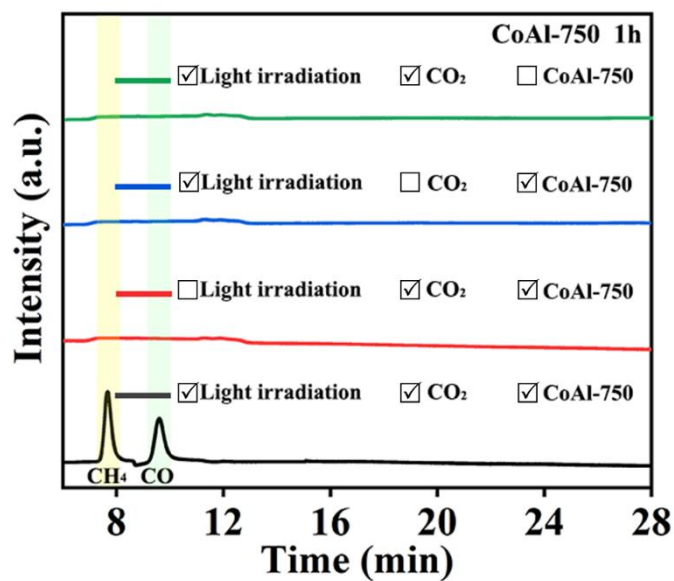

**Fig.S7.** Comparison of gas chromatograms of photocatalyzed CO<sub>2</sub> reduction gas products over CoAl-750 catalyst after reaction under different conditions for 1 h.

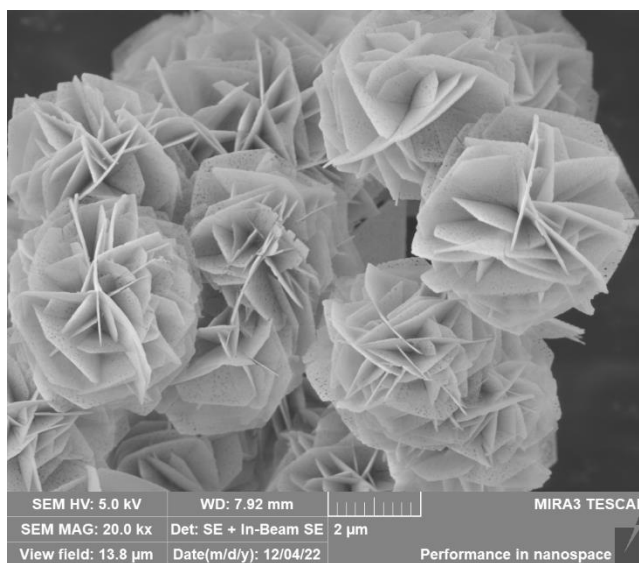

**Fig.S8.** SEM image of the CoAl-750 catalyst after five photocatalytic CO<sub>2</sub> reduction cycles (35h).

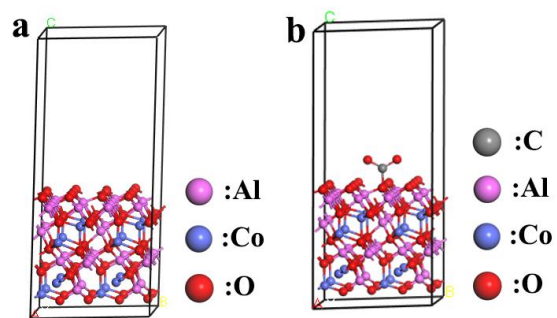

**Fig.S9.** Model for (a) CoAl<sub>2</sub>O<sub>4</sub>(111) and (b) CoAl<sub>2</sub>O<sub>4</sub>(111) adsorbs CO<sub>2</sub> molecules.
